# Supplementary material
Source: HighWire-hosted journal article supplement (https://bmjopen.bmj.com/content/7/11/e017177)
Supplement: inline-supplementary-material-3 [file inline-supplementary-material-3.pdf]

## WHO Trial Registration Data Set – The STOP Study

---

| <b>DATA CATEGORY</b>                          | <b>INFORMATION</b>                                                                                                                                                    |
|-----------------------------------------------|-----------------------------------------------------------------------------------------------------------------------------------------------------------------------|
| Primary registry and trial identifying number | Clinicaltrials.gov. Identifier: NCT03062891                                                                                                                           |
| Date of registration in primary registry      | 5 <sup>th</sup> December 2016                                                                                                                                         |
| Secondary identifying numbers                 | NA                                                                                                                                                                    |
| Source(s) of monetary or material support     | Biomedical Research Centre (BRC) BioResource                                                                                                                          |
| Primary sponsor                               | King's College London                                                                                                                                                 |
| Secondary sponsor(s)                          | NA                                                                                                                                                                    |
| Contact for public queries                    | Alice M. Gregory<br>Department of Psychology<br>Goldsmiths, University of London<br>London, UK, SE14 6NW<br>Email: a.gregory@gold.ac.uk<br>Telephone: +1 541 346 4075 |
| Contact for scientific queries                | Alice M. Gregory<br>Department of Psychology<br>Goldsmiths, University of London<br>London, UK, SE14 6NW<br>Email: a.gregory@gold.ac.uk<br>Telephone: +1 541 346 4075 |
| Public title                                  | The STOP Pilot Study (Sleep Treatment Outcome Predictors)                                                                                                             |
| Scientific title                              | Sleep Treatment Outcome Predictors (STOP) Pilot Study: A randomised controlled trial examining                                                                        |

---

| DATA CATEGORY                             | INFORMATION                                                                                                                                                                                                                                                                                                                                                                                                                                                                                                                                                                                                                                                                                                                                                                                                                                                          |
|-------------------------------------------|----------------------------------------------------------------------------------------------------------------------------------------------------------------------------------------------------------------------------------------------------------------------------------------------------------------------------------------------------------------------------------------------------------------------------------------------------------------------------------------------------------------------------------------------------------------------------------------------------------------------------------------------------------------------------------------------------------------------------------------------------------------------------------------------------------------------------------------------------------------------|
| Countries of recruitment                  | <p data-bbox="771 310 1344 407">predictors of changes of insomnia symptoms and associated traits following cognitive behavioural therapy for insomnia in an unselected sample</p> <p data-bbox="771 443 959 468">United Kingdom</p>                                                                                                                                                                                                                                                                                                                                                                                                                                                                                                                                                                                                                                  |
| Health condition(s) or problem(s) studied | Symptoms of insomnia                                                                                                                                                                                                                                                                                                                                                                                                                                                                                                                                                                                                                                                                                                                                                                                                                                                 |
| Intervention(s)                           | <p data-bbox="771 640 1390 957">Treatment: Online CBT for insomnia (CBT-I). CBT-I participants will receive six weekly sessions delivered by an animated ‘virtual therapist (The Prof) via the online platform ‘Sleepio’. The programme comprises a fully automated media-rich web application, driven dynamically by baseline, adherence, performance and progress data, and provides additional access to elements such as an online library with background information, a community of fellow users, and support, prompts and reminders sent by e-mail.</p> <p data-bbox="771 993 1390 1150">Control: Puzzles. Each week participants will be sent a puzzle to complete online (e.g. logic puzzles, crosswords etc.). The puzzles have been designed to be cognitively engaging and take a similar amount of time to one session of Sleepio (20-25 minutes).</p> |
| Key inclusion and exclusion criteria      | <p data-bbox="771 1224 1338 1320">Inclusion: Female, aged 18+, psychology student (undergraduate or postgraduate) at one of the three study sites.</p> <p data-bbox="771 1356 1390 1413">Exclusion: Male, Under 18, not a psychology student at one of the three study sites.</p>                                                                                                                                                                                                                                                                                                                                                                                                                                                                                                                                                                                    |
| Study type                                | <p data-bbox="771 1486 927 1512">Interventional</p> <p data-bbox="771 1518 1390 1575">Allocation: randomized (stratified by baseline insomnia symptoms)</p> <p data-bbox="771 1581 1214 1606">Intervention model: parallel assignment</p> <p data-bbox="771 1612 1019 1638">Masking: No masking</p> <p data-bbox="771 1644 1076 1669">Primary purpose: treatment</p>                                                                                                                                                                                                                                                                                                                                                                                                                                                                                                 |
| Date of first enrolment                   | 18 <sup>th</sup> November 2016                                                                                                                                                                                                                                                                                                                                                                                                                                                                                                                                                                                                                                                                                                                                                                                                                                       |

| DATA CATEGORY          | INFORMATION                                                                                                                                                                                                                                                                                                                                                                                                                                                                                                                                                                                                          |
|------------------------|----------------------------------------------------------------------------------------------------------------------------------------------------------------------------------------------------------------------------------------------------------------------------------------------------------------------------------------------------------------------------------------------------------------------------------------------------------------------------------------------------------------------------------------------------------------------------------------------------------------------|
| Target sample size     | 240                                                                                                                                                                                                                                                                                                                                                                                                                                                                                                                                                                                                                  |
| Recruitment status     | 197 participants recruited into the study. Waves 1-3 at various stages of completion. Wave 4 to begin July 2017.                                                                                                                                                                                                                                                                                                                                                                                                                                                                                                     |
| Primary outcome(s)     | <ol style="list-style-type: none"> <li>1. Improvement in sleep problems following online CBT as indicated by changes in insomnia symptoms and subjective sleep quality.</li> <li>2. Assessment of treatment acceptability of the CBT-I in an unselected sample.</li> <li>3. Participation and drop-out rates.</li> </ol>                                                                                                                                                                                                                                                                                             |
| Key secondary outcomes | <ol style="list-style-type: none"> <li>1. Predictors of response to treatment outcome. Specific predictors being: anxiety, depression, ADHD symptoms, psychotic experiences, positive mental health, stress, and threatening life events. Main statistic of interest will be effect size.</li> <li>2. Improvement in sleep problems through CBT-I to be associated with improvement of symptoms in other variables. Specifically: anxiety, depression, ADHD symptoms, psychotic experiences, positive mental health, stress, and threatening life events. Main statistic of interest will be effect size.</li> </ol> |
